# Supplementary material for: Heterogeneity of Inflammation-associated Synovial Fibroblasts in Rheumatoid Arthritis and Its Drivers
Source: bioRxiv or medRxiv preprint supplement (doi:10.1101/2022.02.28.482131), 2022-03-02
Supplement: Supplementary file [file media-1.pdf]

Table S1

|                         | Patient 1                                                  | Patient 2                                                                        | Patient 3                                                  | Patient 4                                                                               |
|-------------------------|------------------------------------------------------------|----------------------------------------------------------------------------------|------------------------------------------------------------|-----------------------------------------------------------------------------------------|
| RA criteria met         | 1987 and 2010                                              | 1987 and 2010                                                                    | 1987 and 2010                                              | 2010                                                                                    |
| Disease duration (yrs)  | 11                                                         | 10                                                                               | 23                                                         | 4                                                                                       |
| CCP                     | > 3x ULN                                                   | > 3x ULN                                                                         | > 3x ULN                                                   | > 3x ULN                                                                                |
| RF                      | 2x ULN                                                     | > 3x ULN                                                                         | > 3x ULN                                                   | negative                                                                                |
| Active treatment        | Methotrexate                                               | NSAIDS                                                                           | Leflunomide, adalimumab                                    | Sulfasalazine, hydroxychloroquine                                                       |
| Prior treatments        | TNF inhibitor                                              | Methotrexate, TNF inhibitor                                                      | Methotrexate                                               | Methotrexate, abatacept, adalimumab, certolizumab, infliximab, tocilizumab, tofacitinib |
| Joint                   | Knee                                                       | Knee                                                                             | Wrist                                                      | Knee                                                                                    |
| Krenn Score             | 8                                                          | 5                                                                                | 6                                                          | 4                                                                                       |
| Pathotype               | lymphoid                                                   | lymphoid                                                                         | lymphoid                                                   | lymphoid                                                                                |
| Lining thickness        | 4-5 cells                                                  | > 5 cells                                                                        | > 5 cells                                                  | 4-5 cells                                                                               |
| Stromal cellularity     | Greatly increased                                          | Normal                                                                           | Normal                                                     | Normal                                                                                  |
| Inflammatory infiltrate | Dense band-like or numerous large follicle-like aggregates | Numerous lymphocytes or plasma cells, sometimes forming follicle-like aggregates | Dense band-like or numerous large follicle-like aggregates | Numerous lymphocytes or plasma cells, sometimes forming follicle-like aggregates        |
